# Supplementary material for: Potentiometric Performance of Ion-Selective Electrodes Based on Polyaniline and Chelating Agents: Detection of Fe2+ or Fe3+ Ions
Source: MDPI journal article supplement (doi:10.3390/bios12070446), 2022-06-23
Supplement: s1 [file s1]

## Potentiometric performance of ion-selective-electrodes based on polyaniline and chelating agents: Detection of $\text{Fe}^{2+}$ or $\text{Fe}^{3+}$ ions

Rimeh Ismail<sup>1</sup>, Ivana Šeděnková<sup>1</sup>, Zulfiya Černochová<sup>1</sup>, Iryna Romanenko<sup>1</sup>, Ognen Pop-Georgievski<sup>1</sup>, Martin Hrubý<sup>1</sup>, Elena Tomšík<sup>1\*</sup>

<sup>1</sup>Institute of Macromolecular Chemistry AS CR, Heyrovského nám. 2, 162 06 Prague 6, Czech Republic  
tomsik@imc.cas.cz

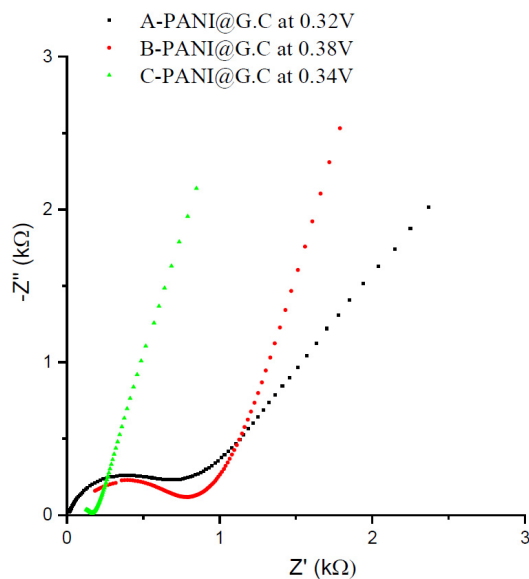

**Figure S1.** EIS in 0.1 M NaCl of A-PANI@G.C, B-PANI@G.C, and C-PANI@G.C.

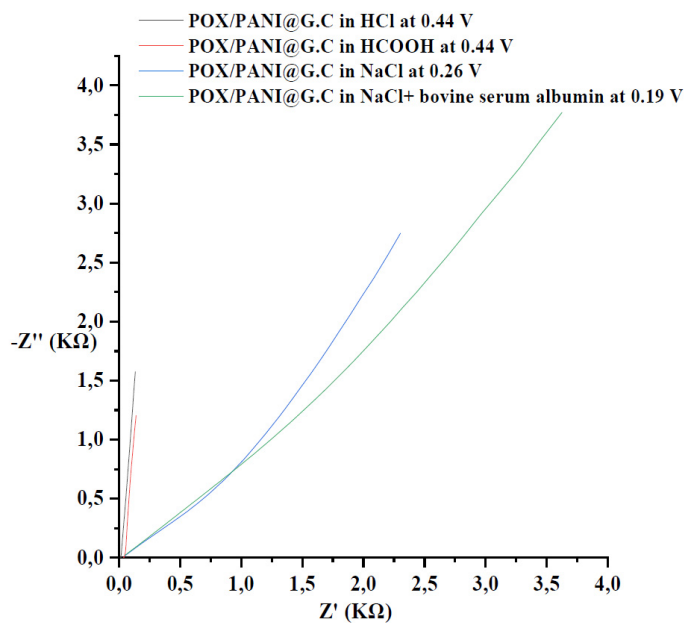

**Figure S2.** EIS POX/PANI@G.C in different electrolytes and with BSA.

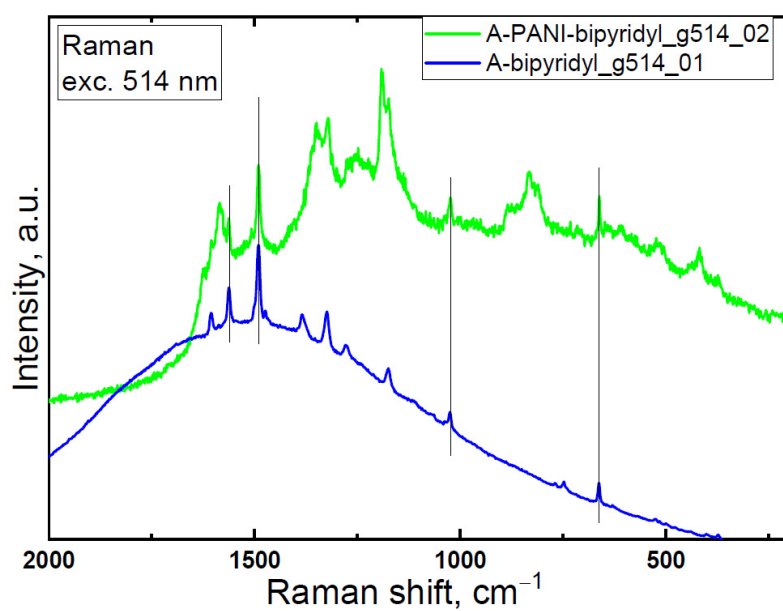

**Figure S3.** Raman spectra, excitation line 514 nm, of A-PANI @G.C.

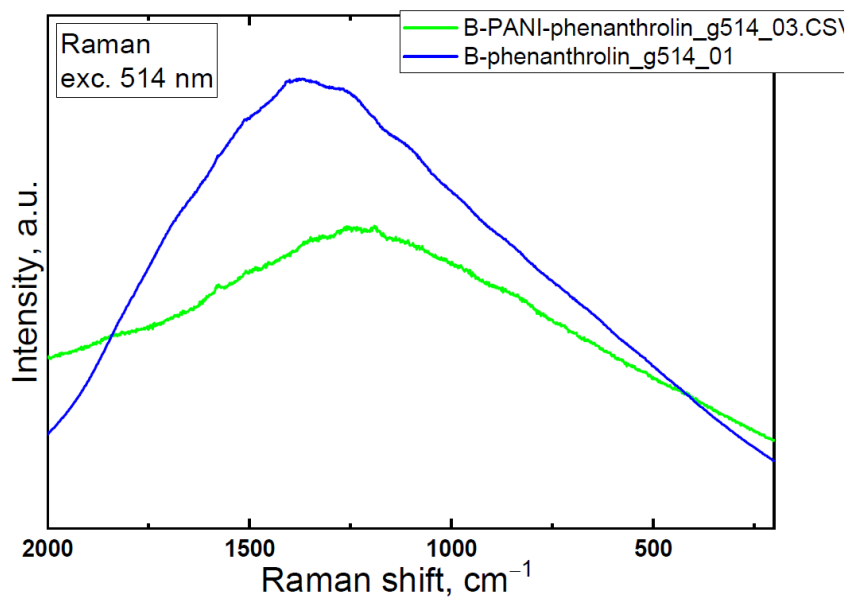

**Figure S4.** Raman spectra, excitation line 514 nm, of B -PANI @G.C.

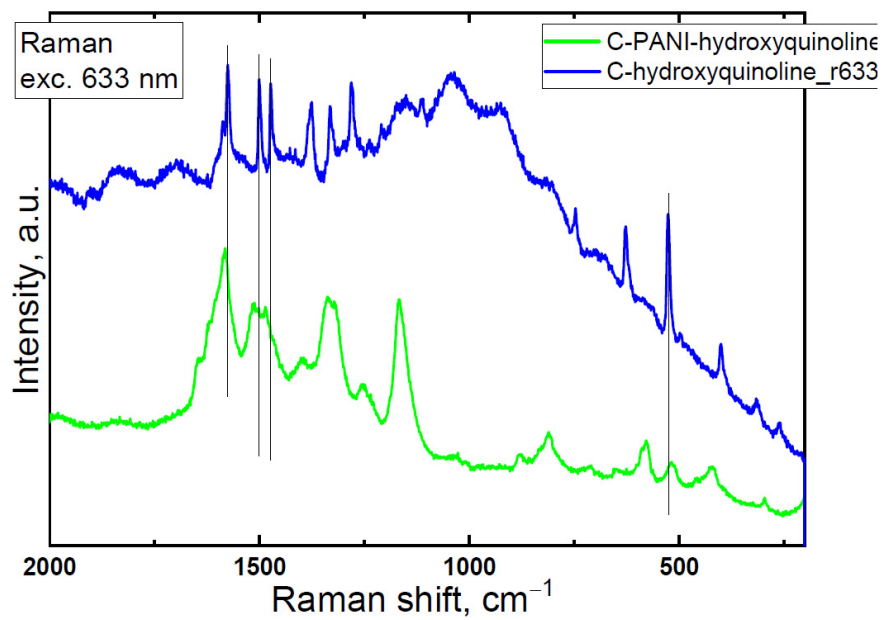

**Figure S5.** Raman spectra, excitation line 633 nm, of C-PANI@G.C.

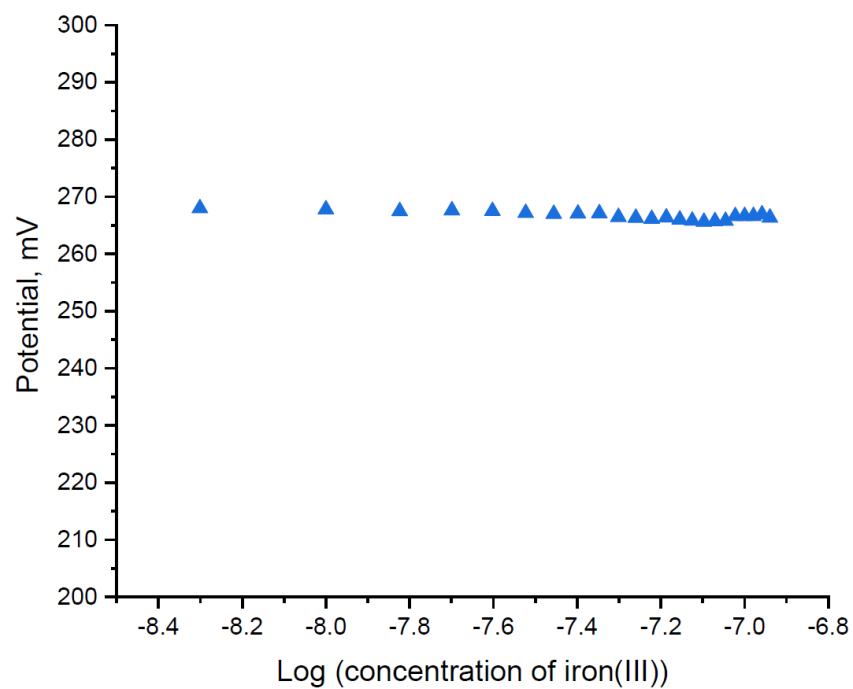

**Figure S6.** Potentiometric measurements of PANI@G.C layer without the presence of chelating molecules.

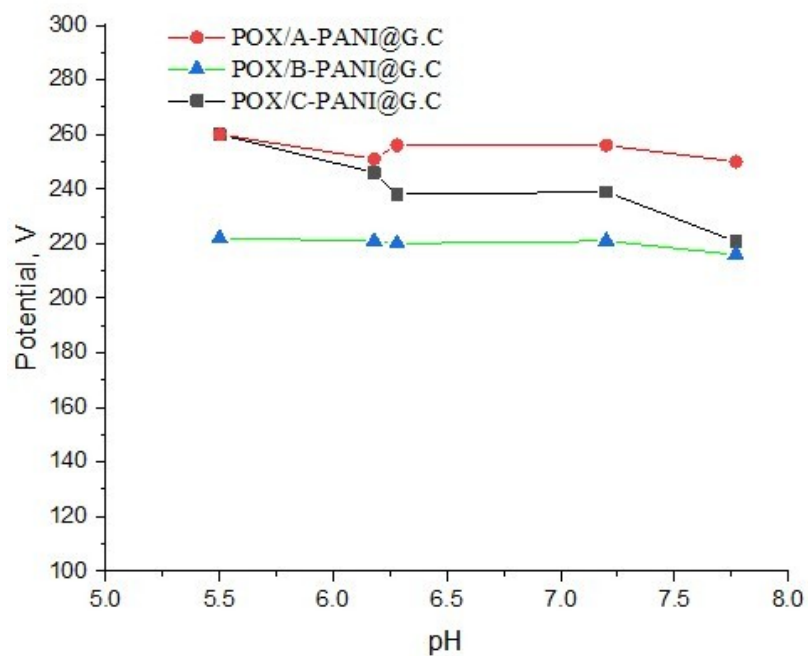

**Figure S7.** Potentiometric response of different sensing layers (different chelating agents) vs pH.

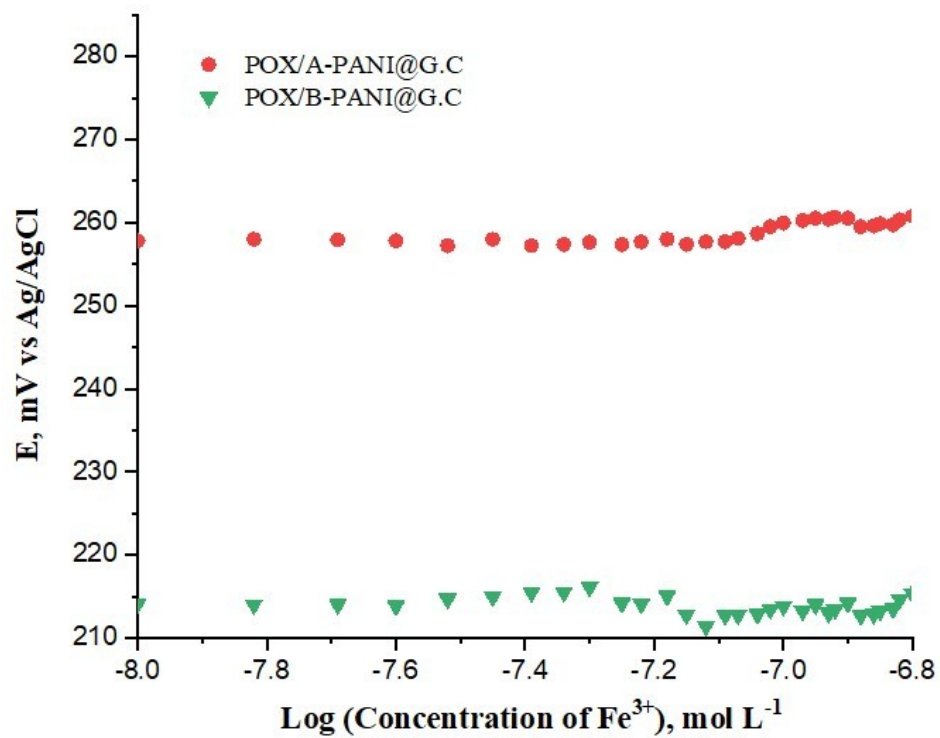

**Figure S8.** Potentiometric response ( $\text{Fe}^{3+}$  concentration vs  $E$ ) of POX/A-PANI@G.C and POX/B-PANI@G.C sensing layers in 0.1 M NaCl.

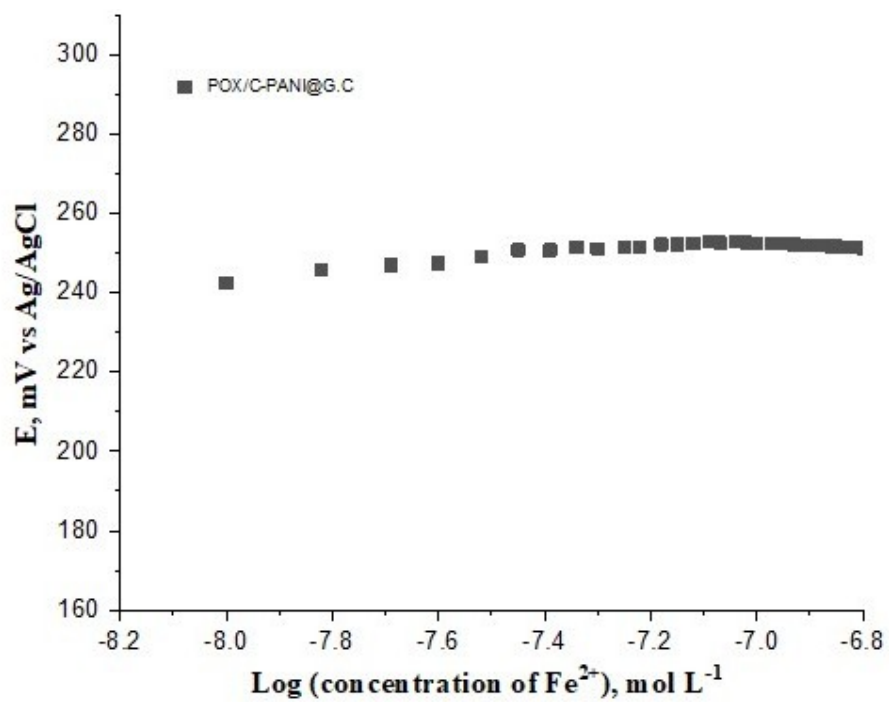

**Figure S9** Potentiometric response (Fe<sup>2+</sup> concentration vs  $E$ ) of POX/C-PANI@G.C sensing layers in 0.1 M NaCl.
